# Supplementary material for: Carbon Fibers as a New Type of Scaffold for Midbrain Organoid Development
Source: MDPI journal article supplement (doi:10.3390/ijms21175959), 2020-08-19
Supplement: s1 [file s1]

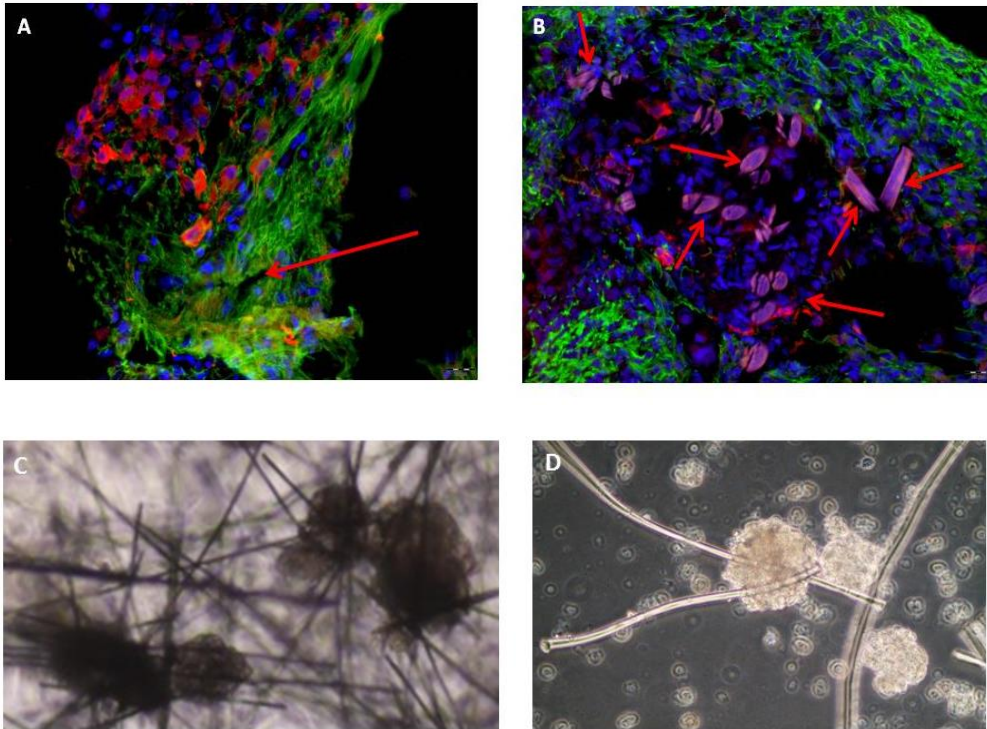

**Figure 1.** Scaffolds incorporated into organoids. CF scaffold A, C PLGA scaffold B, D. Scaffolds in fluorescent micrographs are indicated with arrows.

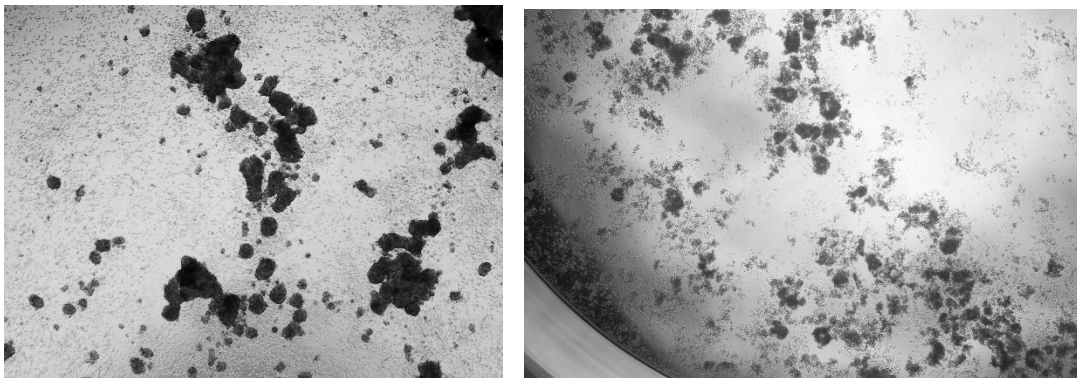

**Figure 2.** Disintegrated organoids.
